# Supplementary material for: Exploring the mechanism of Wogonin in the attenuation of LPS-induced inflammation in BV-2 cells and the protective effect of wogonin on SH-SY5Y cells
Source: Research Square preprint supplement (doi:10.21203/rs.3.rs-7532665/v1), 2025-10-21

As stated in the figure 5 legend, the blot presented in Figure 5 is a representative image from one of the three independent experiments we performed.

The additional lanes (6-7) visible in the full-length blot (provided in Supplementary Fig. 5) are from other experimental samples or conditions that were part of the same experiment but are not directly relevant to the specific point being made in this figure. Our choice to crop the image was solely to improve clarity and focus on the comparison between the control and experimental groups discussed in this section of the manuscript.

The results shown in the cropped region were consistently observed across all replicates, which confirms the reliability of our findings.”

TLR-4

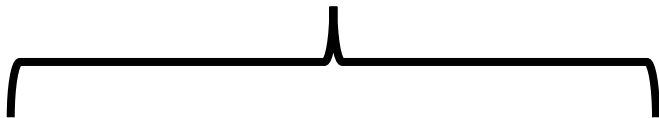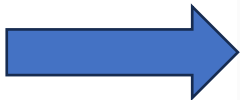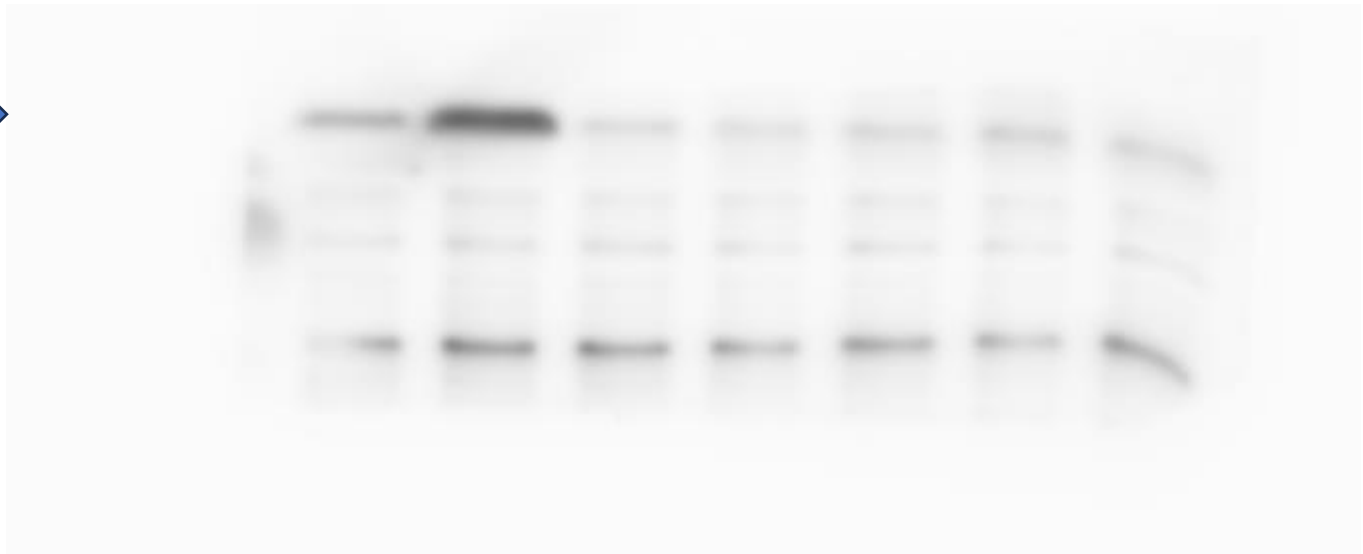

Lane: 1    2    3    4    5    6    7

P-NF- $\kappa$ B P65

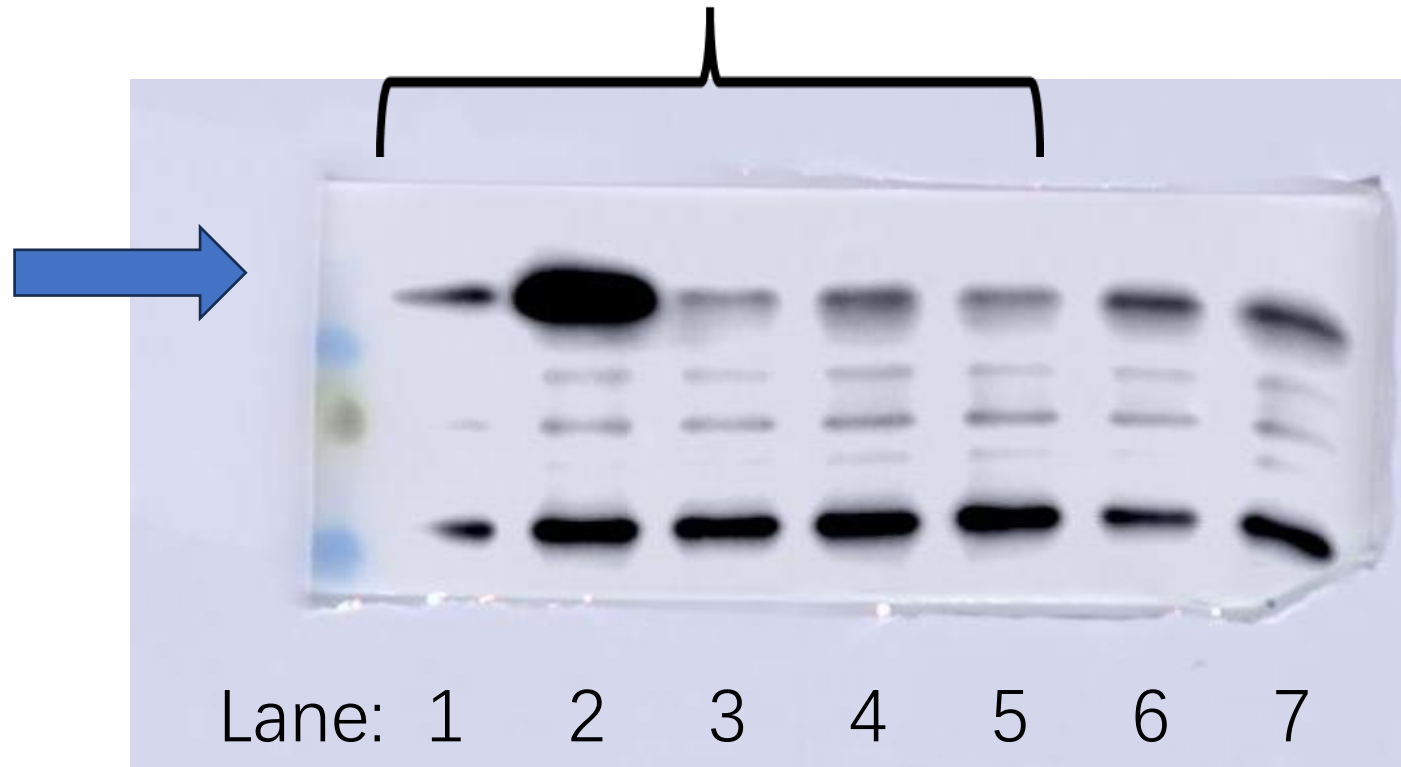

# NF-KB P65

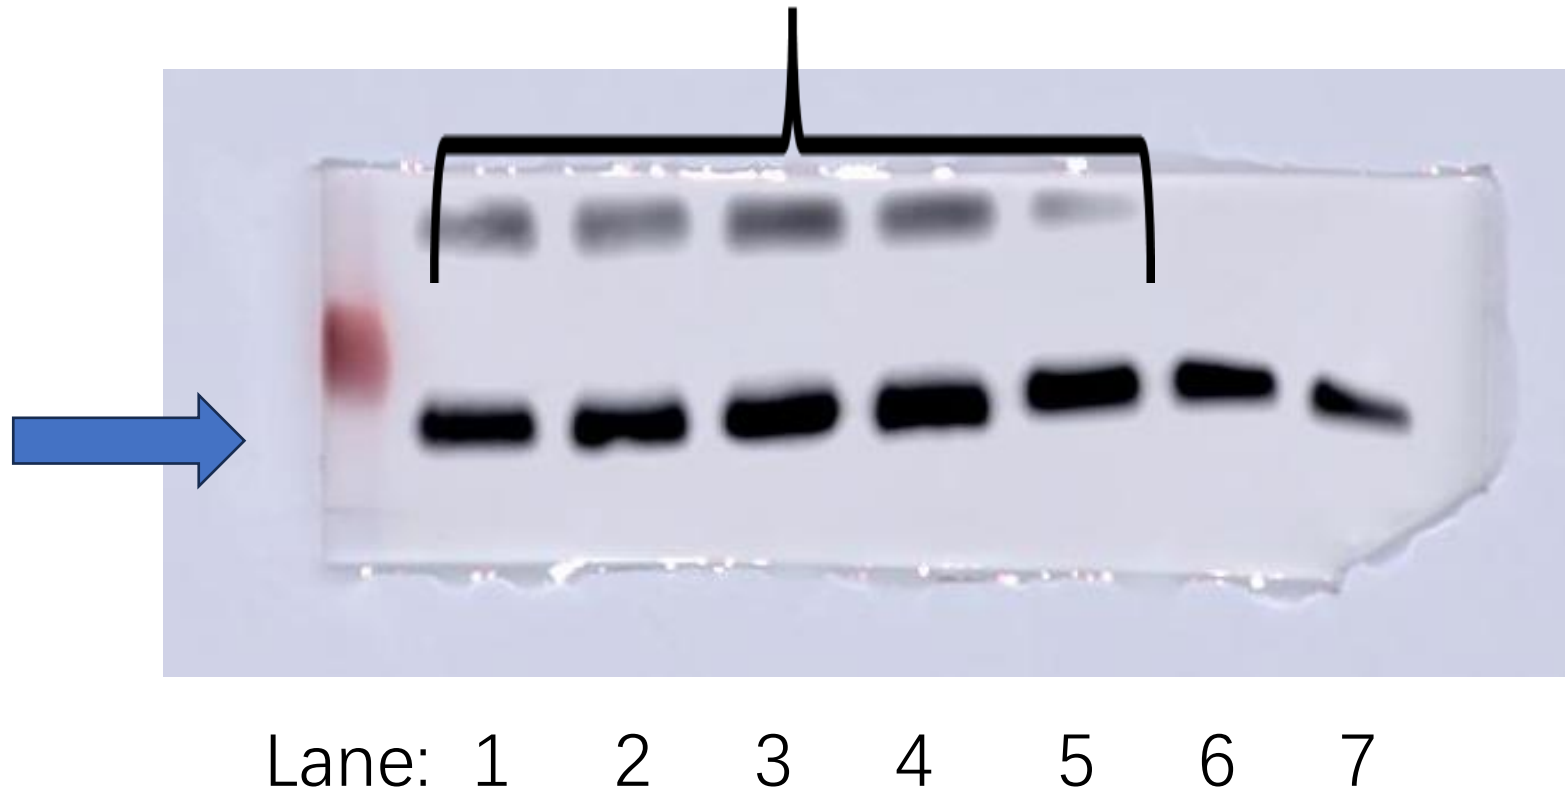

MyD88

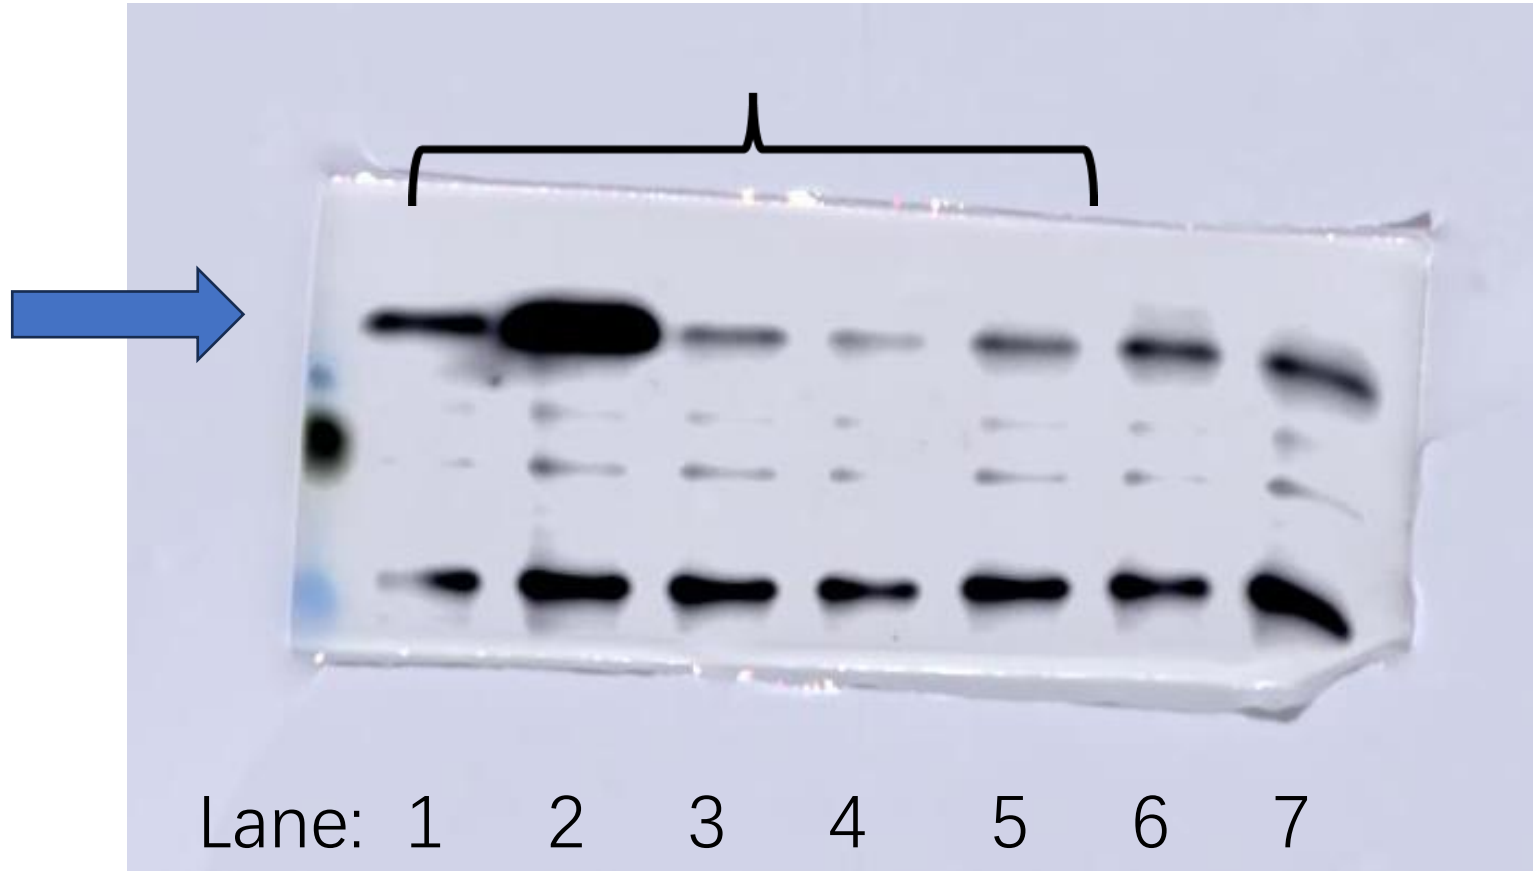

$\beta$ -actin

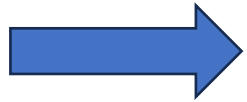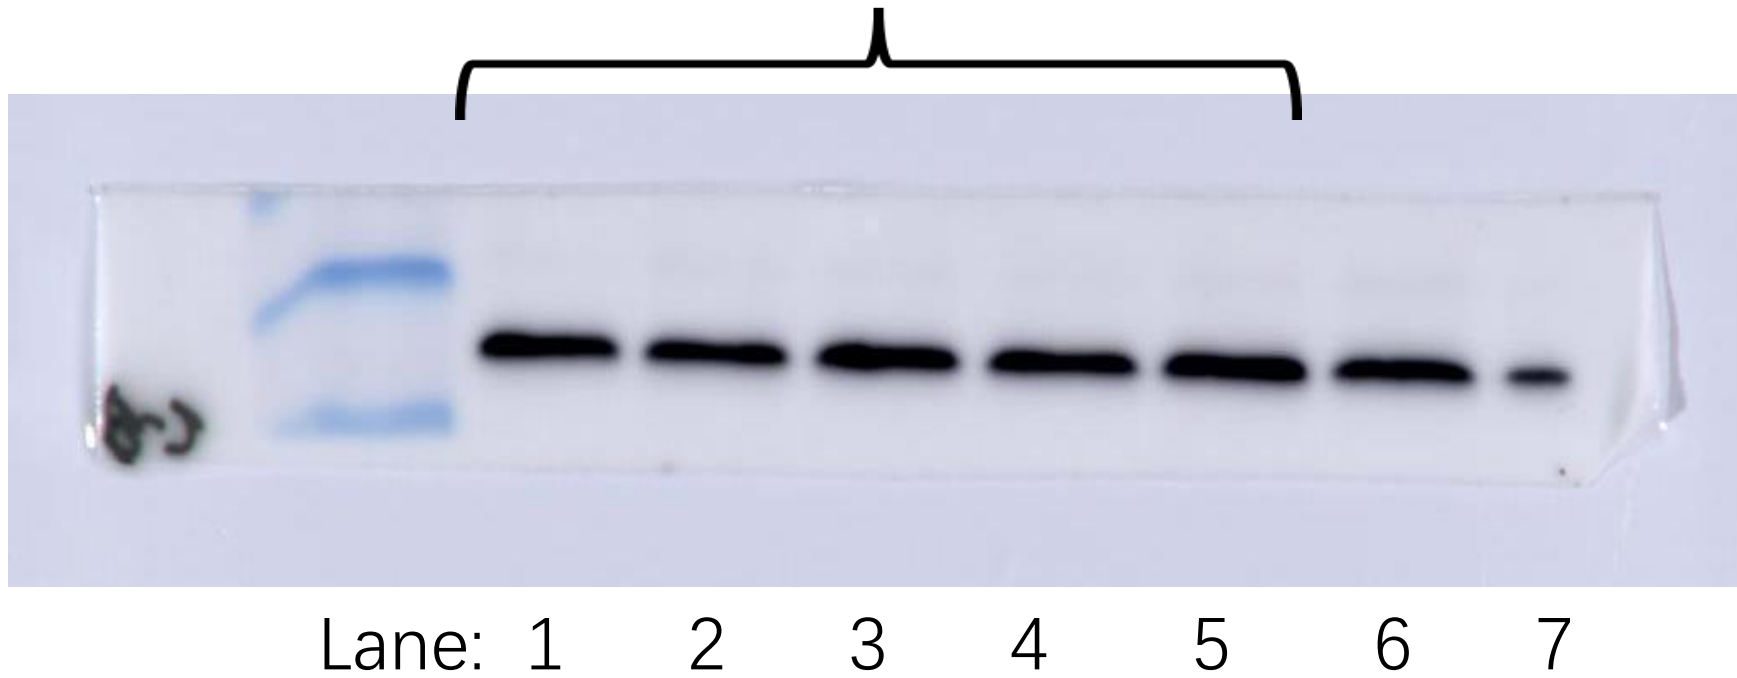

Supplement: Supplementary file 1 [file cbd802915f4aaa55988a6c46.pdf]
